# Supplementary material
Source: publisher figshare collection journal article supplement (https://future-science-group.figshare.com/ndownloader/files/35111143)
Supplement: Supplementary file 1 [file 35111143]

**Supplementary file 2.** Cochrane systematic reviews included in the study

| **Numeral** | | **Title** | **Cochrane Review Group** |
| --- | --- | --- | --- |
| **1** | **Active body surface warming systems for preventing complications caused by inadvertent perioperative hypothermia in adults** | | Cochrane Anaesthesia Group |
| **2** | **Adductor canal blocks for postoperative pain treatment in adults undergoing knee surgery** | | Cochrane Anaesthesia Group |
| **3** | **Adrenaline with lidocaine for digital nerve blocks** | | Cochrane Anaesthesia Group |
| **4** | **Adverse side effects of dexamethasone in surgical patients** | | Cochrane Anaesthesia Group |
| **5** | **Air versus saline in the loss of resistance technique for identification of the epidural space** | | Cochrane Anaesthesia Group |
| **6** | **Airway physical examination tests for detection of difficult airway management in apparently normal adult patients** | | Cochrane Anaesthesia Group |
| **7** | **Alpha-2 adrenergic agonists for the prevention of cardiac complications among adults undergoing surgery** | | Cochrane Anaesthesia Group |
| **8** | **Alpha-2 adrenergic agonists for the prevention of shivering following general anaesthesia** | | Cochrane Anaesthesia Group |
| **9** | **Anaesthesia for hip fracture surgery in adults** | | Cochrane Anaesthesia Group |
| **10** | **Anaesthetic interventions for prevention of awareness during surgery** | | Cochrane Anaesthesia Group |
| **11** | **Anaesthetic regimens for day-procedure laparoscopic cholecystectomy** | | Cochrane Anaesthesia Group |
| **12** | **Anaesthetic techniques for risk of malignant tumour recurrence** | | Cochrane Anaesthesia Group |
| **13** | **Antibiotic prophylaxis for surgical introduction of intracranial ventricular shunts** | | Cochrane Anaesthesia Group |
| **14** | **Antifibrinolytic agents for reducing blood loss in scoliosis surgery in children** | | Cochrane Anaesthesia Group |
| **15** | **Aromatherapy for treatment of postoperative nausea and vomiting** | | Cochrane Anaesthesia Group |
| **16** | **Automated mandatory bolus versus basal infusion for maintenance of epidural analgesia in labour** | | Cochrane Anaesthesia Group |
| **17** | **Avoidance versus use of neuromuscular blocking agents for improving conditions during tracheal intubation or direct laryngoscopy in adults and adolescents** | | Cochrane Anaesthesia Group |
| **18** | **Bispectral index for improving intraoperative awareness and early postoperative recovery in adults** | | Cochrane Anaesthesia Group |
| **19** | **Caudal epidural block versus other methods of postoperative pain relief for circumcision in boys** | | Cochrane Anaesthesia Group |
| **20** | **Cerebral nearâ€infrared spectroscopy (NIRS) for perioperative monitoring of brain oxygenation in children and adults** | | Cochrane Anaesthesia Group |
| **21** | **Clonidine premedication for postoperative analgesia in children** | | Cochrane Anaesthesia Group |
| **22** | **Continuation versus discontinuation of antiplatelet therapy for bleeding and ischaemic events in adults undergoing non-cardiac surgery** | | Cochrane Anaesthesia Group |
| **23** | **Continuous interscalene brachial plexus block versus parenteral analgesia for postoperative pain relief after major shoulder surgery** | | Cochrane Anaesthesia Group |
| **24** | **Continuous intravenous perioperative lidocaine infusion for postoperative pain and recovery in adults** | | Cochrane Anaesthesia Group |
| **25** | **Continuous positive airway pressure (CPAP) during the postoperative period for prevention of postoperative morbidity and mortality following major abdominal surgery** | | Cochrane Anaesthesia Group |
| **26** | **Cooling for cerebral protection during brain surgery** | | Cochrane Anaesthesia Group |
| **27** | **Cuffed versus uncuffed endotracheal tubes for general anaesthesia in children aged eight years and under** | | Cochrane Anaesthesia Group |
| **28** | **Deliberate hypotension with propofol under anaesthesia for functional endoscopic sinus surgery (FESS)** | | Cochrane Anaesthesia Group |
| **29** | **Dexamethasone as an adjuvant to peripheral nerve block** | | Cochrane Anaesthesia Group |
| **30** | **Dexmedetomidine for the management of awake fibreoptic intubation** | | Cochrane Anaesthesia Group |
| **31** | **Different regimens of intravenous sedatives or hypnotics for electroconvulsive therapy (ECT) in adult patients with depression** | | Cochrane Anaesthesia Group |
| **32** | **Early versus late removal of the laryngeal mask airway (LMA) for general anaesthesia** | | Cochrane Anaesthesia Group |
| **33** | **Effectiveness and risks of cricoid pressure during rapid sequence induction for endotracheal intubation** | | Cochrane Anaesthesia Group |
| **34** | **Effects of sevoflurane versus other general anaesthesia on emergence agitation in children** | | Cochrane Anaesthesia Group |
| **35** | **Efficacy and safety of sugammadex versus neostigmine in reversing neuromuscular blockade in adults** | | Cochrane Anaesthesia Group |
| **36** | **Epidural analgesia for adults undergoing cardiac surgery with or without cardiopulmonary bypass** | | Cochrane Anaesthesia Group |
| **37** | **Epidural analgesia for pain relief following hip or knee replacement** | | Cochrane Anaesthesia Group |
| **38** | **Epidural analgesia versus patient-controlled intravenous analgesia for pain following intra-abdominal surgery in adults** | | Cochrane Anaesthesia Group |
| **39** | **Epidural local anaesthetics versus opioid-based analgesic regimens for postoperative gastrointestinal paralysis, vomiting and pain after abdominal surgery** | | Cochrane Anaesthesia Group |
| **40** | **Epidural pain relief versus systemic opioid-based pain relief for abdominal aortic surgery** | | Cochrane Anaesthesia Group |
| **41** | **Fast-track cardiac care for adult cardiac surgical patients** | | Cochrane Anaesthesia Group |
| **42** | **Femoral nerve blocks for acute postoperative pain after knee replacement surgery** | | Cochrane Anaesthesia Group |
| **43** | **High initial concentration versus low initial concentration sevoflurane for inhalational induction of anaesthesia** | | Cochrane Anaesthesia Group |
| **44** | **Hyperbaric versus isobaric bupivacaine for spinal anaesthesia for caesarean section** | | Cochrane Anaesthesia Group |
| **45** | **Hypertonic salt solution for peri-operative fluid management** | | Cochrane Anaesthesia Group |
| **46** | **Incentive spirometry for prevention of postoperative pulmonary complications in upper abdominal surgery** | | Cochrane Anaesthesia Group |
| **47** | **Infraclavicular brachial plexus block for regional anaesthesia of the lower arm** | | Cochrane Anaesthesia Group |
| **48** | **Inhaled nitric oxide for the postoperative management of pulmonary hypertension in infants and children with congenital heart disease** | | Cochrane Anaesthesia Group |
| **49** | **Interventions for protecting renal function in the perioperative period** | | Cochrane Anaesthesia Group |
| **50** | **Interventions for treating inadvertent postoperative hypothermia** | | Cochrane Anaesthesia Group |
| **51** | **Intra-articular lignocaine versus intravenous analgesia with or without sedation for manual reduction of acute anterior shoulder dislocation in adults** | | Cochrane Anaesthesia Group |
| **52** | **Intranasal fentanyl for the management of acute pain in children** | | Cochrane Anaesthesia Group |
| **53** | **Intranasal or transdermal nicotine for the treatment of postoperative pain** | | Cochrane Anaesthesia Group |
| **54** | **Intraoperative use of low volume ventilation to decrease postoperative mortality, mechanical ventilation, lengths of stay and lung injury in adults without acute lung injury** | | Cochrane Anaesthesia Group |
| **55** | **Intravenous nutrients for preventing inadvertent perioperative hypothermia in adults** | | Cochrane Anaesthesia Group |
| **56** | **Intravenous versus inhalation anaesthesia for one-lung ventilation** | | Cochrane Anaesthesia Group |
| **57** | **Intravenous versus inhalational anaesthesia for paediatric outpatient surgery** | | Cochrane Anaesthesia Group |
| **58** | **Intravenous versus inhalational maintenance of anaesthesia for postoperative cognitive outcomes in elderly people undergoing non-cardiac surgery** | | Cochrane Anaesthesia Group |
| **59** | **Intravenous versus inhalational techniques for rapid emergence from anaesthesia in patients undergoing brain tumour surgery** | | Cochrane Anaesthesia Group |
| **60** | **Injectable local anaesthetic agents for dental anaesthesia** | | Cochrane Anaesthesia Group |
| **61** | **Lidocaine for preventing postoperative sore throat** | | Cochrane Anaesthesia Group |
| **62** | **Lidocaine for reducing propofol-induced pain on induction of anaesthesia in adults** | | Cochrane Anaesthesia Group |
| **63** | **Local anaesthetics and regional anaesthesia versus conventional analgesia for preventing persistent postoperative pain in adults and children** | | Cochrane Anaesthesia Group |
| **64** | **Mannitol versus hypertonic saline for brain relaxation in patients undergoing craniotomy** | | Cochrane Anaesthesia Group |
| **65** | **Melatonin for pre- and postoperative anxiety in adults** | | Cochrane Anaesthesia Group |
| **66** | **Music interventions for preoperative anxiety** | | Cochrane Anaesthesia Group |
| **67** | **Needle gauge and tip designs for preventing post-dural puncture headache (PDPH)** | | Cochrane Anaesthesia Group |
| **68** | **Neostigmine for reversal of neuromuscular block in paediatric patients** | | Cochrane Anaesthesia Group |
| **69** | **Nerve blocks or no nerve blocks for pain control after elective hip replacement (arthroplasty) surgery in adults** | | Cochrane Anaesthesia Group |
| **70** | **Neuraxial anaesthesia for lower-limb revascularization** | | Cochrane Anaesthesia Group |
| **71** | **Neuraxial blockade for the prevention of postoperative mortality and major morbidity: an overview of Cochrane systematic reviews** | | Cochrane Anaesthesia Group |
| **72** | **Nitrates for the prevention of cardiac morbidity and mortality in patients undergoing non-cardiac surgery** | | Cochrane Anaesthesia Group |
| **73** | **Nitrous oxide-based techniques versus nitrous oxide-free techniques for general anaesthesia** | | Cochrane Anaesthesia Group |
| **74** | **Nitrous oxide-based versus nitrous oxide-free general anaesthesia and accidental awareness during general anaesthesia in surgical patients** | | Cochrane Anaesthesia Group |
| **75** | **Noninvasive positive pressure ventilation for acute respiratory failure following upper abdominal surgery** | | Cochrane Anaesthesia Group |
| **76** | **Non-pharmacological interventions for assisting the induction of anaesthesia in children** | | Cochrane Anaesthesia Group |
| **77** | **Nonsteroidal anti-inflammatory drugs and perioperative bleeding in paediatric tonsillectomy** | | Cochrane Anaesthesia Group |
| **79** | **Nurse-led versus doctor-led preoperative assessment for elective surgical patients requiring regional or general anaesthesia** | | Cochrane Anaesthesia Group |
| **80** | **Paracervical local anaesthesia for cervical dilatation and uterine intervention** | | Cochrane Anaesthesia Group |
| **81** | **Paravertebral block versus thoracic epidural for patients undergoing thoracotomy** | | Cochrane Anaesthesia Group |
| **82** | **Peribulbar versus retrobulbar anaesthesia for cataract surgery** | | Cochrane Anaesthesia Group |
| **83** | **Perioperative administration of buffered versus non-buffered crystalloid intravenous fluid to improve outcomes following adult surgical procedures** | | Cochrane Anaesthesia Group |
| **84** | **Perioperative alcohol cessation intervention for postoperative complications** | | Cochrane Anaesthesia Group |
| **85** | **Perioperative angiotensin-converting enzyme inhibitors or angiotensin II type 1 receptor blockers for preventing mortality and morbidity in adults** | | Cochrane Anaesthesia Group |
| **86** | **Perioperative beta-blockers for preventing surgery-related mortality and morbidity** | | Cochrane Anaesthesia Group |
| **87** | **Perioperative beta-blockers for preventing surgery-related mortality and morbidity in adults undergoing cardiac surgery** | | Cochrane Anaesthesia Group |
| **88** | **Perioperative beta-blockers for preventing surgery-related mortality and morbidity in adults undergoing non-cardiac surgery** | | Cochrane Anaesthesia Group |
| **89** | **Perioperative dexmedetomidine for acute pain after abdominal surgery in adults** | | Cochrane Anaesthesia Group |
| **90** | **Perioperative fluid volume optimization following proximal femoral fracture** | | Cochrane Anaesthesia Group |
| **91** | **Perioperative increase in global blood flow to explicit defined goals and outcomes following surgery** | | Cochrane Anaesthesia Group |
| **92** | **Perioperative restrictive versus goal-directed fluid therapy for adults undergoing major non-cardiac surgery** | | Cochrane Anaesthesia Group |
| **93** | **Perioperative statin therapy for improving outcomes during and after noncardiac vascular surgery** | | Cochrane Anaesthesia Group |
| **94** | **Peripheral nerve blocks for hip fractures** | | Cochrane Anaesthesia Group |
| **95** | **Pharmacological agents for preventing morbidity associated with the haemodynamic response to tracheal intubation** | | Cochrane Anaesthesia Group |
| **96** | **Pharmacological and non-pharmacological interventions for reducing rocuronium bromide induced pain on injection in children and adults** | | Cochrane Anaesthesia Group |
| **97** | **Pharmacological interventions for the prevention of acute postoperative pain in adults following brain surgery** | | Cochrane Anaesthesia Group |
| **98** | **Physician anaesthetists versus non-physician providers of anaesthesia for surgical patients** | | Cochrane Anaesthesia Group |
| **99** | **Positive end-expiratory pressure (PEEP) during anaesthesia for prevention of mortality and postoperative pulmonary complications** | | Cochrane Anaesthesia Group |
| **100** | **Postoperative epidural analgesia versus systemic analgesia for thoraco-lumbar spine surgery in children** | | Cochrane Anaesthesia Group |
| **101** | **Pre-emptive and preventive opioids for postoperative pain in adults undergoing all types of surgery** | | Cochrane Anaesthesia Group |
| **102** | **Premedication for anxiety in adult day surgery** | | Cochrane Anaesthesia Group |
| **103** | **Preoperative carbohydrate treatment for enhancing recovery after elective surgery** | | Cochrane Anaesthesia Group |
| **104** | **Preoperative inspiratory muscle training for postoperative pulmonary complications in adults undergoing cardiac and major abdominal surgery** | | Cochrane Anaesthesia Group |
| **105** | **Processed electroencephalogram and evoked potential techniques for amelioration of postoperative delirium and cognitive dysfunction following non-cardiac and non-neurosurgical procedures in adults** | | Cochrane Anaesthesia Group |
| **106** | **ProSeal versus Classic laryngeal mask airway (LMA) for positive pressure ventilation in adults undergoing elective surgery** | | Cochrane Anaesthesia Group |
| **107** | **Psychological preparation and postoperative outcomes for adults undergoing surgery under general anaesthesia** | | Cochrane Anaesthesia Group |
| **108** | **Pulmonary artery perfusion versus no perfusion during cardiopulmonary bypass for open heart surgery in adults** | | Cochrane Anaesthesia Group |
| **109** | **Pulse oximetry for perioperative monitoring** | | Cochrane Anaesthesia Group |
| **110** | **Regional analgesia for improvement of long-term functional outcome after elective large joint replacement** | | Cochrane Anaesthesia Group |
| **111** | **Rocuronium versus succinylcholine for rapid sequence induction intubation** | | Cochrane Anaesthesia Group |
| **112** | **Sedation versus general anaesthesia for provision of dental treatment to patients younger than 18 years** | | Cochrane Anaesthesia Group |
| **113** | **Sedative techniques for endoscopic retrograde cholangiopancreatography** | | Cochrane Anaesthesia Group |
| **114** | **Single, double or multiple-injection techniques for non-ultrasound guided axillary brachial plexus block in adults undergoing surgery of the lower arm** | | Cochrane Anaesthesia Group |
| **115** | **Spectral entropy monitoring for adults and children undergoing general anaesthesia** | | Cochrane Anaesthesia Group |
| **116** | **Stimulation of the wrist acupuncture point PC6 for preventing postoperative nausea and vomiting** | | Cochrane Anaesthesia Group |
| **117** | **Sub-Tenon's anaesthesia versus topical anaesthesia for cataract surgery** | | Cochrane Anaesthesia Group |
| **118** | **Sugammadex, a selective reversal medication for preventing postoperative residual neuromuscular blockade** | | Cochrane Anaesthesia Group |
| **119** | **Supplemental oxygen for caesarean section during regional anaesthesia** | | Cochrane Anaesthesia Group |
| **120** | **Supplemental perioperative intravenous crystalloids for postoperative nausea and vomiting** | | Cochrane Anaesthesia Group |
| **121** | **Supraglottic airway devices versus tracheal intubation for airway management during general anaesthesia in obese patients** | | Cochrane Anaesthesia Group |
| **122** | **The effects of high perioperative inspiratory oxygen fraction for adult surgical patients** | | Cochrane Anaesthesia Group |
| **123** | **The use of ultrasound guidance for perioperative neuraxial and peripheral nerve blocks in children** | | Cochrane Anaesthesia Group |
| **124** | **Thermal insulation for preventing inadvertent perioperative hypothermia** | | Cochrane Anaesthesia Group |
| **125** | **Topical anaesthesia alone versus topical anaesthesia with intracameral lidocaine for phacoemulsification** | | Cochrane Anaesthesia Group |
| **126** | **Topical anaesthetics for pain control during repair of dermal laceration** | | Cochrane Anaesthesia Group |
| **127** | **Total intravenous anaesthesia versus inhalational anaesthesia for adults undergoing transabdominal robotic assisted laparoscopic surgery** | | Cochrane Anaesthesia Group |
| **128** | **Tracheal intubation with a flexible intubation scope versus other intubation techniques for obese patients requiring general anaesthesia** | | Cochrane Anaesthesia Group |
| **129** | **Transient neurological symptoms (TNS) following spinal anaesthesia with lidocaine versus other local anaesthetics in adult surgical patients: a network meta-analysis** | | Cochrane Anaesthesia Group |
| **130** | **Ultrasound guidance for upper and lower limb blocks** | | Cochrane Anaesthesia Group |
| **131** | **Use of hyaluronidase as an adjunct to local anaesthetic eye blocks to reduce intraoperative pain in adults** | | Cochrane Anaesthesia Group |
| **132** | **Vapocoolants (cold spray) for pain treatment during intravenous cannulation** | | Cochrane Anaesthesia Group |
| **133** | **Videolaryngoscopy versus direct laryngoscopy for adult patients requiring tracheal intubation** | | Cochrane Anaesthesia Group |
| **134** | **Videolaryngoscopy versus direct laryngoscopy for tracheal intubation in children (excluding neonates)** | | Cochrane Anaesthesia Group |
| **135** | **Warming of intravenous and irrigation fluids for preventing inadvertent perioperative hypothermia** | | Cochrane Anaesthesia Group |
| **136** | **Acupuncture for cancer pain in adults** | | Cochrane Pain and Palliative Care Group |
| **137** | **Acupuncture for neuropathic pain in adults** | | Cochrane Pain and Palliative Care Group |
| **138** | **Acupuncture for the prevention of episodic migraine** | | Cochrane Pain and Palliative Care Group |
| **139** | **Acupuncture for the prevention of tension-type headache** | | Cochrane Pain and Palliative Care Group |
| **140** | **Acupuncture for treating fibromyalgia** | | Cochrane Pain and Palliative Care Group |
| **141** | **Adverse events associated with medium- and long-term use of opioids for chronic non-cancer pain: an overview of Cochrane Reviews** | | Cochrane Pain and Palliative Care Group |
| **142** | **Adverse events associated with single dose oral analgesics for acute postoperative pain in adults - an overview of Cochrane reviews** | | Cochrane Pain and Palliative Care Group |
| **143** | **Aerobic exercise training for adults with fibromyalgia** | | Cochrane Pain and Palliative Care Group |
| **144** | **Amitriptyline for fibromyalgia in adults** | | Cochrane Pain and Palliative Care Group |
| **145** | **Amitriptyline for neuropathic pain in adults** | | Cochrane Pain and Palliative Care Group |
| **146** | **Antidepressants for chronic non-cancer pain in children and adolescents** | | Cochrane Pain and Palliative Care Group |
| **147** | **Antidepressants for neuropathic pain** | | Cochrane Pain and Palliative Care Group |
| **148** | **Antiepileptic drugs for chronic non-cancer pain in children and adolescents** | | Cochrane Pain and Palliative Care Group |
| **149** | **Antiepileptic drugs for neuropathic pain and fibromyalgia - an overview of Cochrane reviews** | | Cochrane Pain and Palliative Care Group |
| **150** | **Antiepileptics other than gabapentin, pregabalin, topiramate, and valproate for the prophylaxis of episodic migraine in adults** | | Cochrane Pain and Palliative Care Group |
| **151** | **Antioxidants for pain in chronic pancreatitis** | | Cochrane Pain and Palliative Care Group |
| **152** | **Antipsychotics for acute and chronic pain in adults** | | Cochrane Pain and Palliative Care Group |
| **153** | **Antipsychotics for fibromyalgia in adults** | | Cochrane Pain and Palliative Care Group |
| **154** | **Aquatic exercise training for fibromyalgia** | | Cochrane Pain and Palliative Care Group |
| **155** | **As required versus fixed schedule analgesic administration for postoperative pain in children** | | Cochrane Pain and Palliative Care Group |
| **156** | **Aspirin for acute treatment of episodic tension-type headache in adults** | | Cochrane Pain and Palliative Care Group |
| **157** | **Aspirin with or without an antiemetic for acute migraine headaches in adults** | | Cochrane Pain and Palliative Care Group |
| **158** | **Bisphosphonates for the relief of pain secondary to bone metastases** | | Cochrane Pain and Palliative Care Group |
| **159** | **Botulinum toxin for myofascial pain syndromes in adults** | | Cochrane Pain and Palliative Care Group |
| **160** | **Botulinum toxins for the prevention of migraine in adults** | | Cochrane Pain and Palliative Care Group |
| **161** | **Breastfeeding for procedural pain in infants beyond the neonatal period** | | Cochrane Pain and Palliative Care Group |
| **162** | **Buprenorphine for neuropathic pain in adults** | | Cochrane Pain and Palliative Care Group |
| **163** | **Buprenorphine for treating cancer pain** | | Cochrane Pain and Palliative Care Group |
| **164** | **Caffeine as an analgesic adjuvant for acute pain in adults** | | Cochrane Pain and Palliative Care Group |
| **165** | **Calcitonin for metastatic bone pain** | | Cochrane Pain and Palliative Care Group |
| **166** | **Cannabinoids for fibromyalgia** | | Cochrane Pain and Palliative Care Group |
| **167** | **Cannabis-based medicines for chronic neuropathic pain in adults** | | Cochrane Pain and Palliative Care Group |
| **168** | **Carbamazepine for chronic neuropathic pain and fibromyalgia in adults** | | Cochrane Pain and Palliative Care Group |
| **169** | **Celiac plexus block for pancreatic cancer pain in adults** | | Cochrane Pain and Palliative Care Group |
| **170** | **Cervico-thoracic or lumbar sympathectomy for neuropathic pain and complex regional pain syndrome** | | Cochrane Pain and Palliative Care Group |
| **171** | **Clonazepam for neuropathic pain and fibromyalgia in adults** | | Cochrane Pain and Palliative Care Group |
| **172** | **Codeine, alone and with paracetamol (acetaminophen), for cancer pain** | | Cochrane Pain and Palliative Care Group |
| **173** | **Cognitive behavioural therapies for fibromyalgia** | | Cochrane Pain and Palliative Care Group |
| **174** | **Combination pharmacotherapy for the treatment of fibromyalgia in adults** | | Cochrane Pain and Palliative Care Group |
| **175** | **Combination pharmacotherapy for the treatment of neuropathic pain in adults** | | Cochrane Pain and Palliative Care Group |
| **176** | **Continuous local anaesthetic wound infusion for postoperative pain after midline laparotomy for colorectal resection in adults** | | Cochrane Pain and Palliative Care Group |
| **177** | **Corticosteroids for the management of cancer-related pain in adults** | | Cochrane Pain and Palliative Care Group |
| **178** | **Cyclobenzaprine for the treatment of myofascial pain in adults** | | Cochrane Pain and Palliative Care Group |
| **179** | **Desipramine for neuropathic pain in adults** | | Cochrane Pain and Palliative Care Group |
| **180** | **Diclofenac with or without an antiemetic for acute migraine headaches in adults** | | Cochrane Pain and Palliative Care Group |
| **181** | **Drug therapy for preventing post-dural puncture headache** | | Cochrane Pain and Palliative Care Group |
| **182** | **Drug therapy for treating post-dural puncture headache** | | Cochrane Pain and Palliative Care Group |
| **183** | **Drugs for the acute treatment of migraine in children and adolescents** | | Cochrane Pain and Palliative Care Group |
| **184** | **Epidural analgesia for pain relief following hip or knee replacement** | | Cochrane Pain and Palliative Care Group |
| **185** | **Exercise for reducing falls in people living with and beyond cancer** | | Cochrane Pain and Palliative Care Group |
| **186** | **Exercise for treating fibromyalgia syndrome** | | Cochrane Pain and Palliative Care Group |
| **187** | **Fentanyl for neuropathic pain in adults** | | Cochrane Pain and Palliative Care Group |
| **188** | **Feverfew for preventing migraine** | | Cochrane Pain and Palliative Care Group |
| **189** | **Flexibility exercise training for adults with fibromyalgia** | | Cochrane Pain and Palliative Care Group |
| **190** | **Gabapentin for chronic neuropathic pain in adults** | | Cochrane Pain and Palliative Care Group |
| **191** | **Gabapentin for fibromyalgia pain in adults** | | Cochrane Pain and Palliative Care Group |
| **192** | **Gabapentin or pregabalin for the prophylaxis of episodic migraine in adults** | | Cochrane Pain and Palliative Care Group |
| **193** | **Herbal medicinal products or preparations for neuropathic pain** | | Cochrane Pain and Palliative Care Group |
| **194** | **High-dose opioids for chronic non-cancer pain: an overview of Cochrane Reviews** | | Cochrane Pain and Palliative Care Group |
| **195** | **Hydromorphone for cancer pain** | | Cochrane Pain and Palliative Care Group |
| **196** | **Hydromorphone for neuropathic pain in adults** | | Cochrane Pain and Palliative Care Group |
| **197** | **Ibuprofen for acute treatment of episodic tension-type headache in adults** | | Cochrane Pain and Palliative Care Group |
| **198** | **Ibuprofen with or without an antiemetic for acute migraine headaches in adults** | | Cochrane Pain and Palliative Care Group |
| **199** | **Imipramine for neuropathic pain in adults** | | Cochrane Pain and Palliative Care Group |
| **200** | **Infraorbital nerve block for postoperative pain following cleft lip repair in children** | | Cochrane Pain and Palliative Care Group |
| **201** | **Interventions for the reduction of prescribed opioid use in chronic non-cancer pain** | | Cochrane Pain and Palliative Care Group |
| **202** | **Interventions for the symptoms and signs resulting from jellyfish stings** | | Cochrane Pain and Palliative Care Group |
| **203** | **Interventions for treating pain and disability in adults with complex regional pain syndrome- an overview of systematic reviews** | | Cochrane Pain and Palliative Care Group |
| **204** | **Interventions for treating persistent and intractable hiccups in adults** | | Cochrane Pain and Palliative Care Group |
| **205** | **Interventions for treating persistent pain in survivors of torture** | | Cochrane Pain and Palliative Care Group |
| **206** | **Interventions to reduce shoulder pain following gynaecological laparoscopic procedures** | | Cochrane Pain and Palliative Care Group |
| **207** | **Intraoperative local anaesthesia for reduction of postoperative pain following general anaesthesia for dental treatment in children and adolescents** | | Cochrane Pain and Palliative Care Group |
| **208** | **Intravenous lidocaine for the treatment of background or procedural burn pain** | | Cochrane Pain and Palliative Care Group |
| **209** | **Intravenous or intramuscular parecoxib for acute postoperative pain in adults** | | Cochrane Pain and Palliative Care Group |
| **210** | **Ketamine as an adjuvant to opioids for cancer pain** | | Cochrane Pain and Palliative Care Group |
| **211** | **Ketoprofen for episodic tension-type headache in adults** | | Cochrane Pain and Palliative Care Group |
| **212** | **Ketorolac for postoperative pain in children** | | Cochrane Pain and Palliative Care Group |
| **213** | **Lamotrigine for chronic neuropathic pain and fibromyalgia in adults** | | Cochrane Pain and Palliative Care Group |
| **214** | **Levetiracetam for neuropathic pain in adults** | | Cochrane Pain and Palliative Care Group |
| **215** | **Liposomal bupivacaine infiltration at the surgical site for the management of postoperative pain** | | Cochrane Pain and Palliative Care Group |
| **216** | **Liposomal bupivacaine peripheral nerve block for the management of postoperative pain** | | Cochrane Pain and Palliative Care Group |
| **217** | **Local anaesthetic sympathetic blockade for complex regional pain syndrome** | | Cochrane Pain and Palliative Care Group |
| **218** | **Long-term opioid management for chronic noncancer pain** | | Cochrane Pain and Palliative Care Group |
| **219** | **Massage with or without aromatherapy for symptom relief in people with cancer** | | Cochrane Pain and Palliative Care Group |
| **220** | **Methadone for cancer pain** | | Cochrane Pain and Palliative Care Group |
| **221** | **Methadone for chronic non-cancer pain in adults** | | Cochrane Pain and Palliative Care Group |
| **222** | **Methadone for neuropathic pain in adults** | | Cochrane Pain and Palliative Care Group |
| **223** | **Milnacipran for neuropathic pain in adults** | | Cochrane Pain and Palliative Care Group |
| **224** | **Milnacipran for pain in fibromyalgia in adults** | | Cochrane Pain and Palliative Care Group |
| **225** | **Mind and body therapy for fibromyalgia** | | Cochrane Pain and Palliative Care Group |
| **226** | **Mirtazapine for fibromyalgia in adults** | | Cochrane Pain and Palliative Care Group |
| **227** | **Mixed exercise training for adults with fibromyalgia** | | Cochrane Pain and Palliative Care Group |
| **228** | **Morphine for chronic neuropathic pain in adults** | | Cochrane Pain and Palliative Care Group |
| **229** | **Multidisciplinary rehabilitation after primary brain tumour treatment** | | Cochrane Pain and Palliative Care Group |
| **230** | **Multidisciplinary rehabilitation for fibromyalgia and musculoskeletal pain in working age adults** | | Cochrane Pain and Palliative Care Group |
| **231** | **Nalbuphine for postoperative pain treatment in children** | | Cochrane Pain and Palliative Care Group |
| **232** | **Naproxen with or without an antiemetic for acute migraine headaches in adults** | | Cochrane Pain and Palliative Care Group |
| **233** | **Needle size for vaccination procedures in children and adolescents** | | Cochrane Pain and Palliative Care Group |
| **234** | **Non-invasive brain stimulation techniques for chronic pain** | | Cochrane Pain and Palliative Care Group |
| **235** | **Non-pharmacological management of infant and young child procedural pain** | | Cochrane Pain and Palliative Care Group |
| **236** | **Non-prescription (OTC) oral analgesics for acute pain - an overview of Cochrane reviews** | | Cochrane Pain and Palliative Care Group |
| **237** | **Non-steroidal anti-inflammatory drugs (NSAIDs) for cancer-related pain in children and adolescents** | | Cochrane Pain and Palliative Care Group |
| **238** | **Non-steroidal anti-inflammatory drugs (NSAIDs) for chronic non-cancer pain in children and adolescents** | | Cochrane Pain and Palliative Care Group |
| **239** | **Normobaric and hyperbaric oxygen therapy for the treatment and prevention of migraine and cluster headache** | | Cochrane Pain and Palliative Care Group |
| **240** | **Nortriptyline for neuropathic pain in adults** | | Cochrane Pain and Palliative Care Group |
| **241** | **Nutritional screening for improving professional practice for patient outcomes in hospital and primary care settings** | | Cochrane Pain and Palliative Care Group |
| **242** | **Opioids for cancer pain - an overview of Cochrane reviews** | | Cochrane Pain and Palliative Care Group |
| **243** | **Opioids for cancer-related pain in children and adolescents** | | Cochrane Pain and Palliative Care Group |
| **244** | **Opioids for chronic non-cancer pain in children and adolescents** | | Cochrane Pain and Palliative Care Group |
| **245** | **Opioids for neuropathic pain** | | Cochrane Pain and Palliative Care Group |
| **246** | **Oral morphine for cancer pain** | | Cochrane Pain and Palliative Care Group |
| **247** | **Oral nonsteroidal anti-inflammatory drugs (NSAIDs) for cancer pain in adults** | | Cochrane Pain and Palliative Care Group |
| **248** | **Oral nonsteroidal anti-inflammatory drugs for fibromyalgia in adults** | | Cochrane Pain and Palliative Care Group |
| **249** | **Oral nonsteroidal anti-inflammatory drugs for neuropathic pain** | | Cochrane Pain and Palliative Care Group |
| **250** | **Oral paracetamol (acetaminophen) for cancer pain** | | Cochrane Pain and Palliative Care Group |
| **251** | **Oral tapentadol for cancer pain** | | Cochrane Pain and Palliative Care Group |
| **252** | **Oxcarbazepine for neuropathic pain** | | Cochrane Pain and Palliative Care Group |
| **253** | **Oxycodone for cancer-related pain** | | Cochrane Pain and Palliative Care Group |
| **254** | **Oxycodone for neuropathic pain in adults** | | Cochrane Pain and Palliative Care Group |
| **255** | **Oxycodone for pain in fibromyalgia in adults** | | Cochrane Pain and Palliative Care Group |
| **256** | **Pain relief for the removal of femoral sheath after percutaneous coronary intervention** | | Cochrane Pain and Palliative Care Group |
| **257** | **Paracetamol (acetaminophen) for acute treatment of episodic tension-type headache in adults** | | Cochrane Pain and Palliative Care Group |
| **258** | **Paracetamol (acetaminophen) for chronic non-cancer pain in children and adolescents** | | Cochrane Pain and Palliative Care Group |
| **259** | **Paracetamol (acetaminophen) with or without an antiemetic for acute migraine headaches in adults** | | Cochrane Pain and Palliative Care Group |
| **260** | **Paracetamol (acetaminophen) with or without codeine or dihydrocodeine for neuropathic pain in adults** | | Cochrane Pain and Palliative Care Group |
| **261** | **Parasympathomimetic drugs for the treatment of salivary gland dysfunction due to radiotherapy** | | Cochrane Pain and Palliative Care Group |
| **262** | **Patient controlled opioid analgesia versus non-patient controlled opioid analgesia for postoperative pain** | | Cochrane Pain and Palliative Care Group |
| **263** | **Perioperative intravenous ketamine for acute postoperative pain in adults** | | Cochrane Pain and Palliative Care Group |
| **264** | **Perioperative transversus abdominis plane (TAP) blocks for analgesia after abdominal surgery** | | Cochrane Pain and Palliative Care Group |
| **265** | **Pharmacologic interventions for treating phantom limb pain** | | Cochrane Pain and Palliative Care Group |
| **266** | **Pharmacological interventions for pain in children and adolescents with life-limiting conditions** | | Cochrane Pain and Palliative Care Group |
| **267** | **Pharmacological interventions for painful sickle cell vaso-occlusive crises in adults** | | Cochrane Pain and Palliative Care Group |
| **268** | **Pharmacotherapy for the prevention of chronic pain after surgery in adults** | | Cochrane Pain and Palliative Care Group |
| **269** | **Phenytoin for neuropathic pain and fibromyalgia in adults** | | Cochrane Pain and Palliative Care Group |
| **270** | **Physical activity and exercise for chronic pain in adults: an overview of Cochrane Reviews** | | Cochrane Pain and Palliative Care Group |
| **271** | **Physiotherapy for pain and disability in adults with complex regional pain syndrome (CRPS) types I and II** | | Cochrane Pain and Palliative Care Group |
| **272** | **Positioning and spinal bracing for pain relief in metastatic spinal cord compression in adults** | | Cochrane Pain and Palliative Care Group |
| **273** | **Posture and fluids for preventing post-dural puncture headache** | | Cochrane Pain and Palliative Care Group |
| **274** | **Pregabalin for neuropathic pain in adults** | | Cochrane Pain and Palliative Care Group |
| **275** | **Pregabalin for pain in fibromyalgia in adults** | | Cochrane Pain and Palliative Care Group |
| **276** | **Psychological interventions for acute pain after open heart surgery** | | Cochrane Pain and Palliative Care Group |
| **277** | **Psychological interventions for needle-related procedural pain and distress in children and adolescents** | | Cochrane Pain and Palliative Care Group |
| **278** | **Psychological interventions for parents of children and adolescents with chronic illness** | | Cochrane Pain and Palliative Care Group |
| **279** | **Psychological therapies (Internet-delivered) for the management of chronic pain in adults** | | Cochrane Pain and Palliative Care Group |
| **280** | **Psychological therapies (remotely delivered) for the management of chronic and recurrent pain in children and adolescents** | | Cochrane Pain and Palliative Care Group |
| **281** | **Psychological therapies for the management of chronic and recurrent pain in children and adolescents** | | Cochrane Pain and Palliative Care Group |
| **282** | **Psychological therapies for the management of chronic neuropathic pain in adults** | | Cochrane Pain and Palliative Care Group |
| **283** | **Psychological therapies for the management of chronic pain (excluding headache) in adults** | | Cochrane Pain and Palliative Care Group |
| **284** | **Psychological therapies for the prevention of migraine in adults** | | Cochrane Pain and Palliative Care Group |
| **285** | **Resistance exercise training for fibromyalgia** | | Cochrane Pain and Palliative Care Group |
| **286** | **Salicylate-containing rubefacients for acute and chronic musculoskeletal pain in adults** | | Cochrane Pain and Palliative Care Group |
| **287** | **Selective serotonin reuptake inhibitors (SSRIs) and serotonin-norepinephrine reuptake inhibitors (SNRIs) for the prevention of migraine in adults** | | Cochrane Pain and Palliative Care Group |
| **288** | **Selective serotonin reuptake inhibitors (SSRIs) and serotonin-norepinephrine reuptake inhibitors (SNRIs) for the prevention of tension-type headache in adults** | | Cochrane Pain and Palliative Care Group |
| **289** | **Serotonin and noradrenaline reuptake inhibitors (SNRIs) for fibromyalgia** | | Cochrane Pain and Palliative Care Group |
| **290** | **Single dose dipyrone (metamizole) for acute postoperative pain in adults** | | Cochrane Pain and Palliative Care Group |
| **291** | **Single dose dipyrone for acute renal colic pain** | | Cochrane Pain and Palliative Care Group |
| **292** | **Single dose intra-articular morphine for pain control after knee arthroscopy** | | Cochrane Pain and Palliative Care Group |
| **293** | **Single dose intravenous paracetamol or intravenous propacetamol for postoperative pain** | | Cochrane Pain and Palliative Care Group |
| **294** | **Single dose oral aceclofenac for postoperative pain in adults** | | Cochrane Pain and Palliative Care Group |
| **295** | **Single dose oral acemetacin for acute postoperative pain in adults** | | Cochrane Pain and Palliative Care Group |
| **296** | **Single dose oral analgesics for acute postoperative pain in adults - an overview of Cochrane reviews** | | Cochrane Pain and Palliative Care Group |
| **297** | **Single dose oral aspirin for acute postoperative pain in adults** | | Cochrane Pain and Palliative Care Group |
| **298** | **Single dose oral celecoxib for acute postoperative pain in adults** | | Cochrane Pain and Palliative Care Group |
| **299** | **Single dose oral codeine, as a single agent, for acute postoperative pain in adults** | | Cochrane Pain and Palliative Care Group |
| **300** | **Single dose oral dexibuprofen [S(+)-ibuprofen] for acute postoperative pain in adults** | | Cochrane Pain and Palliative Care Group |
| **301** | **Single dose oral dextropropoxyphene, alone and with paracetamol (acetaminophen), for postoperative pain** | | Cochrane Pain and Palliative Care Group |
| **302** | **Single dose oral diclofenac for acute postoperative pain in adults** | | Cochrane Pain and Palliative Care Group |
| **303** | **Single dose oral diflunisal for acute postoperative pain in adults** | | Cochrane Pain and Palliative Care Group |
| **304** | **Single dose oral dihydrocodeine for acute postoperative pain** | | Cochrane Pain and Palliative Care Group |
| **305** | **Single dose oral etodolac for acute postoperative pain in adults** | | Cochrane Pain and Palliative Care Group |
| **306** | **Single dose oral etoricoxib for acute postoperative pain in adults** | | Cochrane Pain and Palliative Care Group |
| **307** | **Single dose oral fenbufen for acute postoperative pain in adults** | | Cochrane Pain and Palliative Care Group |
| **308** | **Single dose oral fenoprofen for acute postoperative pain in adults** | | Cochrane Pain and Palliative Care Group |
| **309** | **Single dose oral flurbiprofen for acute postoperative pain in adults** | | Cochrane Pain and Palliative Care Group |
| **310** | **Single dose oral gabapentin for established acute postoperative pain in adults** | | Cochrane Pain and Palliative Care Group |
| **311** | **Single dose oral ibuprofen for acute postoperative pain in adults** | | Cochrane Pain and Palliative Care Group |
| **312** | **Single dose oral ibuprofen plus caffeine for acute postoperative pain in adults** | | Cochrane Pain and Palliative Care Group |
| **313** | **Single dose oral ibuprofen plus codeine for acute postoperative pain in adults** | | Cochrane Pain and Palliative Care Group |
| **314** | **Single dose oral ibuprofen plus oxycodone for acute postoperative pain in adults** | | Cochrane Pain and Palliative Care Group |
| **315** | **Single dose oral ibuprofen plus paracetamol (acetaminophen) for acute postoperative pain** | | Cochrane Pain and Palliative Care Group |
| **316** | **Single dose oral indometacin for the treatment of acute postoperative pain** | | Cochrane Pain and Palliative Care Group |
| **317** | **Single dose oral ketoprofen or dexketoprofen for acute postoperative pain in adults** | | Cochrane Pain and Palliative Care Group |
| **318** | **Single dose oral lornoxicam for acute postoperative pain in adults** | | Cochrane Pain and Palliative Care Group |
| **319** | **Single dose oral lumiracoxib for postoperative pain in adults** | | Cochrane Pain and Palliative Care Group |
| **320** | **Single dose oral mefenamic acid for acute postoperative pain in adults** | | Cochrane Pain and Palliative Care Group |
| **321** | **Single dose oral meloxicam for acute postoperative pain in adults** | | Cochrane Pain and Palliative Care Group |
| **322** | **Single dose oral nabumetone for acute postoperative pain in adults** | | Cochrane Pain and Palliative Care Group |
| **323** | **Single dose oral naproxen and naproxen sodium for acute postoperative pain in adults** | | Cochrane Pain and Palliative Care Group |
| **324** | **Single dose oral nefopam for acute postoperative pain in adults** | | Cochrane Pain and Palliative Care Group |
| **325** | **Single dose oral oxycodone and oxycodone plus paracetamol (acetaminophen) for acute postoperative pain in adults** | | Cochrane Pain and Palliative Care Group |
| **326** | **Single dose oral paracetamol (acetaminophen) for postoperative pain in adults** | | Cochrane Pain and Palliative Care Group |
| **327** | **Single dose oral paracetamol (acetaminophen) with codeine for postoperative pain in adults** | | Cochrane Pain and Palliative Care Group |
| **328** | **Single dose oral piroxicam for acute postoperative pain** | | Cochrane Pain and Palliative Care Group |
| **329** | **Single dose oral rofecoxib for acute postoperative pain in adults** | | Cochrane Pain and Palliative Care Group |
| **330** | **Single dose oral sulindac for acute postoperative pain in adults** | | Cochrane Pain and Palliative Care Group |
| **331** | **Single dose oral tenoxicam for acute postoperative pain in adults** | | Cochrane Pain and Palliative Care Group |
| **332** | **Single dose oral tiaprofenic acid for acute postoperative pain in adults** | | Cochrane Pain and Palliative Care Group |
| **333** | **Single fixed-dose oral dexketoprofen plus tramadol for acute postoperative pain in adults** | | Cochrane Pain and Palliative Care Group |
| **334** | **Single-dose intravenous diclofenac for acute postoperative pain in adults** | | Cochrane Pain and Palliative Care Group |
| **335** | **Spinal cord stimulation for cancer-related pain in adults** | | Cochrane Pain and Palliative Care Group |
| **336** | **Sumatriptan (all routes of administration) for acute migraine attacks in adults - overview of Cochrane reviews** | | Cochrane Pain and Palliative Care Group |
| **337** | **Sumatriptan (intranasal route of administration) for acute migraine attacks in adults** | | Cochrane Pain and Palliative Care Group |
| **338** | **Sumatriptan (oral route of administration) for acute migraine attacks in adults** | | Cochrane Pain and Palliative Care Group |
| **339** | **Sumatriptan (rectal route of administration) for acute migraine attacks in adults** | | Cochrane Pain and Palliative Care Group |
| **340** | **Sumatriptan (subcutaneous route of administration) for acute migraine attacks in adults** | | Cochrane Pain and Palliative Care Group |
| **341** | **Sumatriptan plus naproxen for the treatment of acute migraine attacks in adults** | | Cochrane Pain and Palliative Care Group |
| **342** | **Sweet tasting solutions for reduction of needle-related procedural pain in children aged one to 16 years** | | Cochrane Pain and Palliative Care Group |
| **343** | **Sweet-tasting solutions for needle-related procedural pain in infants one month to one year of age** | | Cochrane Pain and Palliative Care Group |
| **344** | **Systemic administration of local anesthetic agents to relieve neuropathic pain** | | Cochrane Pain and Palliative Care Group |
| **345** | **Tapentadol for chronic musculoskeletal pain in adults** | | Cochrane Pain and Palliative Care Group |
| **346** | **Topical analgesics for acute and chronic pain in adults - an overview of Cochrane Reviews** | | Cochrane Pain and Palliative Care Group |
| **347** | **Topical capsaicin (high concentration) for chronic neuropathic pain in adults** | | Cochrane Pain and Palliative Care Group |
| **348** | **Topical capsaicin (low concentration) for chronic neuropathic pain in adults** | | Cochrane Pain and Palliative Care Group |
| **349** | **Topical clonidine for neuropathic pain** | | Cochrane Pain and Palliative Care Group |
| **350** | **Topical lidocaine for neuropathic pain in adults** | | Cochrane Pain and Palliative Care Group |
| **351** | **Topical NSAIDs for acute musculoskeletal pain in adults** | | Cochrane Pain and Palliative Care Group |
| **352** | **Topical NSAIDs for chronic musculoskeletal pain in adults** | | Cochrane Pain and Palliative Care Group |
| **353** | **Topiramate for the prophylaxis of episodic migraine in adults** | | Cochrane Pain and Palliative Care Group |
| **354** | **Tramadol for neuropathic pain in adults** | | Cochrane Pain and Palliative Care Group |
| **355** | **Tramadol for postoperative pain treatment in children** | | Cochrane Pain and Palliative Care Group |
| **356** | **Tramadol with or without paracetamol (acetaminophen) for cancer pain** | | Cochrane Pain and Palliative Care Group |
| **357** | **Transcutaneous electric nerve stimulation (TENS) for cancer pain in adults** | | Cochrane Pain and Palliative Care Group |
| **358** | **Transcutaneous electrical nerve stimulation (TENS) for chronic pain - an overview of Cochrane Reviews** | | Cochrane Pain and Palliative Care Group |
| **359** | **Transcutaneous electrical nerve stimulation (TENS) for fibromyalgia in adults** | | Cochrane Pain and Palliative Care Group |
| **360** | **Transcutaneous electrical nerve stimulation (TENS) for neuropathic pain in adults** | | Cochrane Pain and Palliative Care Group |
| **361** | **Transcutaneous electrical nerve stimulation (TENS) for phantom pain and stump pain following amputation in adults** | | Cochrane Pain and Palliative Care Group |
| **362** | **Transcutaneous electrical nerve stimulation for acute pain** | | Cochrane Pain and Palliative Care Group |
| **363** | **Transdermal fentanyl for cancer pain** | | Cochrane Pain and Palliative Care Group |
| **364** | **Triptans for acute cluster headache** | | Cochrane Pain and Palliative Care Group |
| **365** | **Valproate (valproic acid or sodium valproate or a combination of the two) for the prophylaxis of episodic migraine in adults** | | Cochrane Pain and Palliative Care Group |
| **366** | **Valproic acid and sodium valproate for neuropathic pain and fibromyalgia in adults** | | Cochrane Pain and Palliative Care Group |
| **367** | **Venlafaxine for neuropathic pain in adults** | | Cochrane Pain and Palliative Care Group |
| **368** | **Vitamin D for the treatment of chronic painful conditions in adults** | | Cochrane Pain and Palliative Care Group |
| **369** | **Zolmitriptan for acute migraine attacks in adults** | | Cochrane Pain and Palliative Care Group |
| **370** | **Zonisamide for neuropathic pain in adults** | | Cochrane Pain and Palliative Care Group |
